GAD65-reactive T-cells have been postulated to recognize the peptide derived by coxsackie B4 virus, leading to autoimmune type 1 diabetes (4). Furthermore, sequence homology between GAD65 and cytomegalovirus might participate in the onset of type 1 diabetes and stiff-man syndrome (5). Interestingly, HHV-6 is closely related to cytomegalovirus genomically and antigenically, and GAD65-reactive T-cells also recognize an epitope derived by HHV-6 (5), suggesting that reactivation of HHV-6 might contribute to the onset of autoimmune type 1 diabetes by the molecular mimicry.

NOBUAKI OZAKI, MD, PHD  
YOSHITAKA MIURA, MD, PHD  
YUTAKA OISO, MD, PHD

From the Department of Endocrinology and Diabetes, Nagoya University Graduate School of Medicine, Nagoya, Japan.

Address correspondence to Nobuaki Ozaki, Department of Endocrinology and Diabetes, Nagoya University Graduate School of Medicine, 65 Tsurumai-cho Showa-ku, Nagoya 466-8550, Japan. E-mail: n-ozaki@med.nagoya-u.ac.jp.

DOI: 10.2337/dc05-2087

© 2006 by the American Diabetes Association.

## Favorable Effects of Early Insulin Secretion by Nateglinide on Postprandial Hyperlipidemia in Patients With Type 2 Diabetes

Severe postprandial hyperlipidemia is observed in and substantially contributes to the progression of atherosclerosis in type 2 diabetic patients, especially those with insulin resistance and compensatory hyperinsulinemia (1–4). As with postprandial hyperglycemia, increased lipid levels in type 2 diabetic patients peak late, and the magnitude of the increase is greater than that seen in healthy people (2,4). To determine whether early insulin secretion by nateglinide can suppress postprandial hyperlipidemia in type 2 diabetic patients, 20 Japanese patients (10 men and 10 women, [means  $\pm$  SE] aged  $56.4 \pm 2.5$  years, with BMI and HbA<sub>1c</sub>  $25.6 \pm 1.2$  kg/m<sup>2</sup> and  $5.7 \pm 0.1\%$ , respectively) with newly diagnosed type 2 diabetes performed a 75-g oral glucose tolerance test and oral fat tolerance test (OFTT) twice. A 90-mg dose of nateglinide was administered immediately before fat loading in one of the two OFTTs. In the OFTT, each subject ingested 17 g fat/m<sup>2</sup> surface area (OFTT cream; Jomo Food Industry, Takasaki, Japan) (2). Plasma glucose and serum insulin, triglycerides, and remnant-like particles cholesterol (RLPC) concentrations were determined before and 30 min and 1, 2, and 4 h after fat loading.

When nateglinide was not administered (Nate–), triglycerides and RLPC continued to increase during OFTT, while no significant changes in plasma glucose or insulin were noted. In OFTT with nateglinide administration (Nate+), increases in triglycerides and RLPC after fat loading were significantly lower than in Nate– by ANOVA ( $P < 0.001$ ). The average increments of triglycerides and RLPC from baseline to 4 h were 1.1 mmol/l and 0.31 mmol/l in Nate– and 0.46 mmol/l ( $-58\%$ ,  $P < 0.01$ ) and 0.05 mmol/l ( $-84\%$ ,  $P < 0.01$ ) in Nate+, respectively. Plasma glucose levels in Nate+ were gradually decreased by 1.6 mmol/l on average after 2 h. Insulin levels in Nate+ peaked after 30 min and then

decreased to below baseline level by 4 h. Furthermore, in Nate–, the regarding rates of increase for triglycerides and RLPC during OFTT had significant correlations with  $\Sigma$ insulin during the oral glucose tolerance test ( $r = 0.63$  and  $0.72$ , respectively), which is a surrogate measure for insulin resistance, while in Nate+, there were no significant correlations among them.

Early insulin secretion following nateglinide administration was thus proved to inhibit postprandial hyperlipidemia in type 2 diabetic patients. Improvements in insulin resistance over a short period of time seem to exert substantial influence on lipid parameters. Insulin secretion patterns appear to play a major role in postprandial hyperlipidemia as well as hyperglycemia.

MASUMI AI, MD, PHD<sup>1</sup>  
AKIRA TANAKA, MD, PHD<sup>2</sup>  
KYOKO OGITA, MD<sup>1</sup>  
KENTARO SHIMOKADO, MD, PHD<sup>1</sup>

From the <sup>1</sup>Department of Vascular Medicine and Geriatrics, Tokyo Medical and Dental University, Tokyo, Japan; and the <sup>2</sup>Department of Health and Nutrition, College of Human Environmental Studies, Kanto-gakuin University, Yokohama, Japan.

Address correspondence to Masumi Ai, MD, PhD, Department of Vascular Medicine and Geriatrics, Tokyo Medical and Dental University, 1-5-45 Yushima, Bunkyo-ku, Tokyo, Japan. E-mail: ai.vasc@tmd.ac.jp.

K.S. has received grant/research support from Yamanouchi Pharma.

DOI: 10.2337/dc05-2336

© 2006 by the American Diabetes Association.

## References

1. Sullivan JR, Shear NH: The drug hypersensitivity syndrome: what is the pathogenesis? *Arch Dermatol* 137:357–364, 2001
2. Ozaki N, Miura Y, Sakakibara A, Oiso Y: A case of hypersensitivity syndrome induced by methimazole for Graves' disease. *Thyroid* 15:1333–1336, 2005
3. Kawasaki E, Takino H, Yano M, Uotani S, Matsumoto K, Takao Y, Yamaguchi Y, Akazawa S, Nagataki S: Autoantibodies to glutamic acid decarboxylase in patients with IDDM and autoimmune thyroid disease. *Diabetes* 43:80–86, 1994
4. Oldstone MB: Molecular mimicry and immune-mediated diseases. *FASEB J* 12:1255–1265, 1998
5. Hiemstra HS, Schloot NC, van Veelen PA, Willemsen SJ, Franken KL, van Rood JJ, de Vries RR, Chaudhuri A, Behan PO, Drijfhout JW, Roep BO: Cytomegalovirus in autoimmunity: T cell crossreactivity to viral antigen and autoantigen glutamic acid decarboxylase. *Proc Natl Acad Sci U S A* 98:3988–3991, 2001

## References

1. Zilverman DB: Atherogenesis: a postprandial phenomenon. *Circulation* 60:473–485, 1979
2. Ai M, Tanaka A, Ogita K, Sekine M, Numano F, Reaven GM: Relationship between plasma insulin concentration and plasma remnant lipoprotein response to an oral fat load in patients with type 2 diabetes. *J Am Coll Cardiol* 38:1628–1632, 2001
3. Ai M, Tanaka A, Ogita K, Sekine M, Numano F, Reaven GM: Relationship between plasma insulin and remnant lipoprotein concentrations in patients with impaired glucose tolerance. *J Clin Endocrinol Metab* 85:3557–3560, 2000
4. Uchino H, Niwa M, Shimizu T, Nishiyama K, Kawamori R: Impairment of early insulin response after glucose load, rather than insulin resistance, is responsible for postprandial hyperglycemia seen in obese type 2 diabetes: assessment using nateglinide, a new insulin secretagogue. *Endocr J* 47:639–641, 2000
